# Supplementary material
Source: HighWire-hosted journal article supplement (https://erj.ersjournals.com/content/53/6/1801568)

**Supplementary material:**

**Table S1:** Univariable and multivariable cox proportional hazards for cancer specific survival.

|                    |          | Univariable |        |            |             | Multivariable |       |            |             |
|--------------------|----------|-------------|--------|------------|-------------|---------------|-------|------------|-------------|
|                    |          | HR          | p      | L95%<br>CI | U 95%<br>CI | HR            | p     | L95%<br>CI | U 95%<br>CI |
| Age                |          |             |        |            |             |               |       |            |             |
|                    | <60      | 1.000       | -      | -          | -           | 1.000         | -     | -          | -           |
|                    | 60-69    | 2.351       | 0.076  | 0.914      | 6.045       | 1.980         | 0.159 | 0.765      | 5.126       |
|                    | 70-79    | 2.927       | 0.023  | 1.162      | 7.370       | 2.254         | 0.087 | 0.889      | 5.716       |
|                    | >=80     | 3.192       | 0.020  | 1.196      | 8.516       | 1.837         | 0.239 | 0.668      | 5.054       |
| Sex                |          |             |        |            |             |               |       |            |             |
|                    | Female   | 1.000       | -      | -          | -           | 1.000         | -     | -          | -           |
|                    | Male     | 1.335       | 0.145  | 0.905      | 1.969       | 1.357         | 0.135 | 0.909      | 2.026       |
| Performance status |          |             |        |            |             |               |       |            |             |
|                    | 0-1      | 1.000       | -      | -          | -           | 1.000         | -     | -          | -           |
|                    | 2        | 1.685       | 0.023  | 1.073      | 2.646       | 1.457         | 0.134 | 0.891      | 2.382       |
|                    | 3-4      | 1.479       | 0.232  | 0.779      | 2.808       | 0.906         | 0.787 | 0.442      | 1.856       |
| Stage              |          |             |        |            |             |               |       |            |             |
|                    | IA       | 1.000       | -      | -          | -           | 1.000         | -     | -          | -           |
|                    | IB       | 2.015       | <0.001 | 1.366      | 2.972       | 2.006         | 0.001 | 1.335      | 3.014       |
| Histology          |          |             |        |            |             |               |       |            |             |
|                    | Squamous | 1.000       | -      | -          | -           | 1.000         | -     | -          | -           |
|                    | Other    | 0.939       | 0.786  | 0.598      | 1.475       | 1.221         | 0.399 | 0.768      | 1.941       |
|                    | Benign   | -           | -      | -          | -           | -             | -     | -          | -           |
|                    | Unknown  | 1.587       | 0.141  | 0.857      | 2.938       | 1.181         | 0.638 | 0.591      | 2.359       |
| Treatment          |          |             |        |            |             |               |       |            |             |
|                    | Surgery  | 1.000       | -      | -          | -           |               |       |            |             |
|                    | SABR     | 1.579       | 0.068  | 0.967      | 2.580       | 1.469         | 0.213 | 0.802      | 2.688       |
|                    | CFRT     | 2.806       | <0.001 | 1.672      | 4.712       | 2.281         | 0.011 | 1.204      | 4.319       |

**Table S2.** Cox multivariable cancer and treatment related survival model assessing a possible interaction between treatment type and performance status.

|                          | HR    | p     | Lower<br>95% CI | Upper<br>95% CI |
|--------------------------|-------|-------|-----------------|-----------------|
| Age                      |       |       |                 |                 |
| <b>&lt;60</b>            | 1.000 | -     | -               | -               |
| <b>60-69</b>             | 1.620 | 0.250 | 0.712           | 3.687           |
| <b>70-79</b>             | 1.941 | 0.106 | 0.869           | 4.337           |
| <b>≥80</b>               | 1.612 | 0.298 | 0.657           | 3.956           |
| Sex                      |       |       |                 |                 |
| <b>Female</b>            | 1.000 | -     | -               | -               |
| <b>Male</b>              | 1.385 | 0.092 | 0.948           | 2.024           |
| Histology                |       |       |                 |                 |
| <b>Adenocarcinoma</b>    | -     | -     | -               | -               |
| <b>Squamous cell</b>     | -     | -     | -               | -               |
| <b>Other</b>             | -     | -     | -               | -               |
| <b>Unknown</b>           | -     | -     | -               | -               |
| Pre-op stage             |       |       |                 |                 |
| <b>IA</b>                | 1.000 | -     | -               | -               |
| <b>IB</b>                | 1.727 | 0.005 | 1.178           | 2.530           |
| Performance status       |       |       |                 |                 |
| <b>0-1</b>               | 1.000 | -     | -               | -               |
| <b>2</b>                 | 1.103 | 0.777 | 0.559           | 2.177           |
| <b>3</b>                 | 2.716 | 0.056 | 0.975           | 7.568           |
| Treatment                |       |       |                 |                 |
| <b>Surgery</b>           | 1.000 | -     | -               | -               |
| <b>SABR</b>              | 1.370 | 0.372 | 0.686           | 2.733           |
| <b>CFRT</b>              | 2.300 | 0.042 | 1.029           | 5.141           |
| PS-Treatment interaction |       |       |                 |                 |
| <b>PS 2 – SABR</b>       | 1.165 | 0.796 | 0.367           | 3.697           |
| <b>PS 3 – SABR</b>       | 0.231 | 0.063 | 0.049           | 1.086           |
| <b>PS 2 – CFRT</b>       | 1.262 | 0.700 | 0.386           | 4.132           |
| <b>PS 3 – CFRT</b>       | 0.188 | 0.053 | 0.035           | 1.025           |

**Table S3.** Fine and Gray competing risks model for non-cancer death with death due to cancer and treatment considered competing risks.

|                    |                | Subdistribution<br>hazard ratio | p      | Lower<br>95% CI | Upper<br>95% CI |
|--------------------|----------------|---------------------------------|--------|-----------------|-----------------|
| Age                |                |                                 |        |                 |                 |
|                    | <b>&lt;60</b>  | 1.000                           | -      | -               | -               |
|                    | <b>60-69</b>   | 0.958                           | 0.914  | 0.437           | 2.097           |
|                    | <b>70-79</b>   | 1.563                           | 0.233  | 0.750           | 3.256           |
|                    | <b>≥80</b>     | 1.793                           | 0.152  | 0.807           | 3.984           |
| Sex                |                |                                 |        |                 |                 |
|                    | <b>Female</b>  | 1.000                           | -      | -               | -               |
|                    | <b>Male</b>    | 1.682                           | 0.003  | 1.189           | 2.381           |
| Pre-op Stage       |                |                                 |        |                 |                 |
|                    | <b>IA</b>      | 1.000                           | -      | -               | -               |
|                    | <b>IB</b>      | 0.834                           | 0.317  | 0.584           | 1.190           |
| Performance status |                |                                 |        |                 |                 |
|                    | <b>0-1</b>     | 1.000                           | -      | -               | -               |
|                    | <b>2</b>       | 1.130                           | 0.578  | 0.734           | 1.741           |
|                    | <b>3-4</b>     | 1.753                           | 0.034  | 1.045           | 2.942           |
| Treatment          |                |                                 |        |                 |                 |
|                    | <b>Surgery</b> | 1.000                           | -      | -               | -               |
|                    | <b>SABR</b>    | 2.161                           | <0.001 | 1.408           | 3.315           |
|                    | <b>CFRT</b>    | 1.868                           | 0.027  | 1.075           | 3.243           |

**Table S4.** Multivariable cox proportional hazards model for overall survival in patients with pathologically confirmed lung cancer.

|                    | Hazard ratio | p      | Lower 95% CI | Upper 95% CI |
|--------------------|--------------|--------|--------------|--------------|
| Age                |              |        |              |              |
| <b>&lt;60</b>      | 1.000        | -      | -            | -            |
| <b>60-69</b>       | 1.524        | 0.161  | 0.845        | 2.748        |
| <b>70-79</b>       | 2.232        | 0.005  | 1.267        | 3.933        |
| <b>&gt;=80</b>     | 1.993        | 0.033  | 1.058        | 3.756        |
| Sex                |              |        |              |              |
| <b>Female</b>      | 1.000        | -      | -            | -            |
| <b>Male</b>        | 1.762        | <0.001 | 1.324        | 2.345        |
| Pre-op stage       |              |        |              |              |
| <b>IA</b>          | 1.000        | -      | -            | -            |
| <b>IB</b>          | 1.404        | 0.020  | 1.055        | 1.868        |
| Performance status |              |        |              |              |
| <b>0-1</b>         | 1.000        | -      | -            | -            |
| <b>2</b>           | 1.363        | 0.090  | 0.953        | 1.950        |
| <b>3-4</b>         | 1.076        | 0.794  | 0.619        | 1.871        |
| Treatment          |              |        |              |              |
| <b>Surgery</b>     | 1.000        | -      | -            | -            |
| <b>SABR</b>        | 1.696        | 0.011  | 1.130        | 2.545        |
| <b>CFRT</b>        | 2.232        | 0.001  | 1.385        | 3.598        |

**Table S5.** Multivariable cox proportional hazards model for cancer-specific survival in patients with pathologically confirmed lung cancer.

|                    | HR    | p     | Lower 95% CI | Upper 95% CI |
|--------------------|-------|-------|--------------|--------------|
| Age                |       |       |              |              |
| <b>&lt;60</b>      | 1.000 | -     | -            | -            |
| <b>60-69</b>       | 2.625 | 0.072 | 0.917        | 7.512        |
| <b>70-79</b>       | 2.928 | 0.041 | 1.043        | 8.218        |
| <b>&gt;=80</b>     | 1.706 | 0.367 | 0.534        | 5.452        |
| Sex                |       |       |              |              |
| <b>Female</b>      | 1.000 | -     | -            | -            |
| <b>Male</b>        | 1.412 | 0.124 | 0.909        | 2.193        |
| Performance status |       |       |              |              |
| <b>0-1</b>         | 1.000 | -     | -            | -            |
| <b>2</b>           | 1.483 | 0.169 | 0.845        | 2.603        |
| <b>3-4</b>         | 1.041 | 0.926 | 0.447        | 2.425        |
| Stage              |       |       |              |              |
| <b>IA</b>          | 1.000 | -     | -            | -            |
| <b>IB</b>          | 2.110 | 0.001 | 1.350        | 3.296        |
| Histology          |       |       |              |              |
| <b>Squamous</b>    | 1.000 | -     | -            | -            |
| <b>Other</b>       | 1.251 | 0.347 | 0.784        | 1.996        |
| Treatment          |       |       |              |              |
| <b>Surgery</b>     | 1.000 | -     | -            | -            |
| <b>SABR</b>        | 1.634 | 0.133 | 0.861        | 3.099        |
| <b>CFRT</b>        | 2.144 | 0.044 | 1.021        | 4.502        |

**Table S6.** Multivariable cox proportional hazards model for cancer and treatment-related survival in patients with pathologically confirmed lung cancer.

|                    | HR    | p     | Lower<br>95% CI | Upper<br>95% CI |
|--------------------|-------|-------|-----------------|-----------------|
| Age                |       |       |                 |                 |
| <b>&lt;60</b>      | 1.000 | -     | -               | -               |
| <b>60-69</b>       | 2.027 | 0.113 | 0.845           | 4.862           |
| <b>70-79</b>       | 2.386 | 0.047 | 1.014           | 5.619           |
| <b>≥80</b>         | 1.490 | 0.436 | 0.547           | 4.059           |
| Sex                |       |       |                 |                 |
| <b>Female</b>      | 1.000 | -     | -               | -               |
| <b>Male</b>        | 1.443 | 0.080 | 0.958           | 2.176           |
| Pre-op stage       |       |       |                 |                 |
| <b>1A</b>          | 1.000 | -     | -               | -               |
| <b>1B</b>          | 1.762 | 0.007 | 1.169           | 2.657           |
| Performance status |       |       |                 |                 |
| <b>0-1</b>         | 1.000 | -     | -               | -               |
| <b>2</b>           | 1.235 | 0.438 | 0.724           | 2.106           |
| <b>3</b>           | 0.962 | 0.926 | 0.422           | 2.189           |
| Treatment          |       |       |                 |                 |
| <b>Surgery</b>     | 1.000 | -     | -               | -               |
| <b>SABR</b>        | 1.370 | 0.324 | 0.733           | 2.561           |
| <b>CFRT</b>        | 2.018 | 0.049 | 1.004           | 4.055           |

**Table S7.** Multivariable Fine and Gray competing risks model for cancer or treatment related death with death due to other causes considered a competing risk. Including only patients with pathologically confirmed lung cancer.

|                    | SHR   | p     | Lower 95% CI | Upper 95% CI |
|--------------------|-------|-------|--------------|--------------|
| Age                |       |       |              |              |
| <60                | 1.000 | -     | -            | -            |
| 60-69              | 2.059 | 0.109 | 0.851        | 4.983        |
| 70-79              | 2.264 | 0.070 | 0.937        | 5.472        |
| >=80               | 1.419 | 0.503 | 0.510        | 3.951        |
| Sex                |       |       |              |              |
| Female             | 1.000 | -     | -            | -            |
| Male               | 1.290 | 0.253 | 0.834        | 1.995        |
| Pre-op Stage       |       |       |              |              |
| IA                 | 1.000 | -     | -            | -            |
| IB                 | 1.707 | 0.013 | 1.120        | 2.600        |
| Performance status |       |       |              |              |
| 0-1                | 1.000 | -     | -            | -            |
| 2                  | 1.189 | 0.517 | 0.704        | 2.006        |
| 3-4                | 1.018 | 0.970 | 0.408        | 2.538        |
| Treatment          |       |       |              |              |
| Surgery            | 1.000 | -     | -            | -            |
| SABR               | 1.149 | 0.685 | 0.587        | 2.250        |
| CFRT               | 1.464 | 0.321 | 0.690        | 3.106        |

**Figure S1.** Sites of recurrence at 2 years post-treatment as a proportion of all patients experiencing recurrence by treatment cohort.

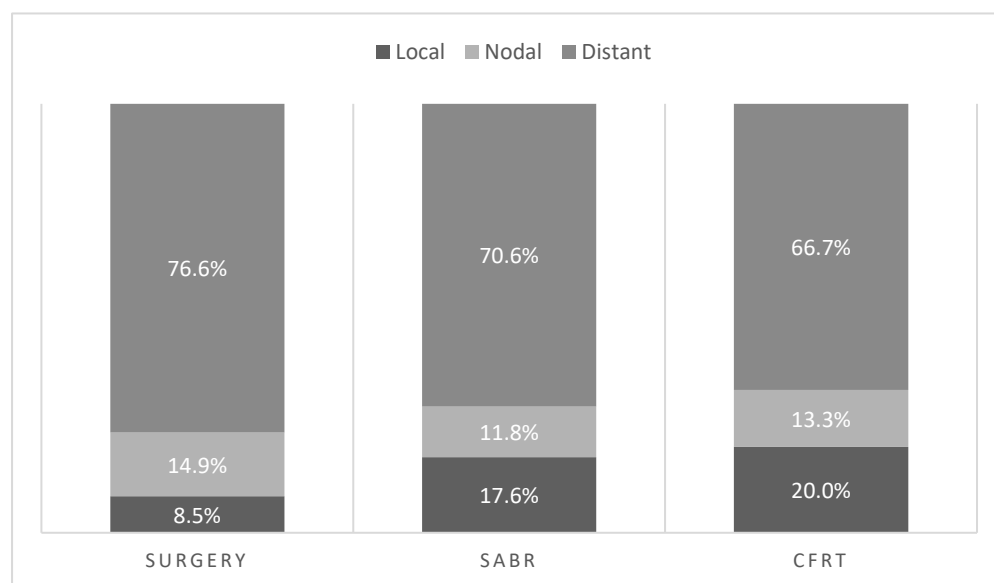

Supplement: inline-supplementary-material-1 [file inline-supplementary-material-1.pdf]
